# Supplementary material
Source: PubMed Central journal article supplement (PMC7166105)
Supplement: mmc7.pdf [file mmc7.pdf]

# INDIVIDUAL CONFLICT OF INTEREST STATEMENT

## *American Association of Hip and Knee Surgeons*

(Adopted from the American Academy of Orthopaedic Surgeons disclosure statement)

The following form **must be filled out completely and submitted by each author (example, 6 authors, 6 forms).**  
**All items require a response. If there is no relevant disclosure for a given item, enter "None."**

---

### Manuscript Title

1. Royalties from a company or supplier (The following conflicts were disclosed)  
None
2. Speakers bureau/paid presentations for a company or supplier (The following conflicts were disclosed)  
None
- 3A. Paid employee for a company or supplier (The following conflicts were disclosed)  
None
- 3B. Paid consultant for a company or supplier (The following conflicts were disclosed)  
None
- 3C. Unpaid consultants for a company or supplier (The following conflicts were disclosed)  
None
4. Stock or stock options in a company or supplier (The following conflicts were disclosed)  
None
5. Research support from a company or supplier as a Principal Investigator (The following conflicts were disclosed)  
None
6. Other financial or material support from a company or supplier (The following conflicts were disclosed)  
None
7. Royalties, financial or material support from publishers (The following conflicts were disclosed)  
Book royalties from JB Learning, Sudbury, Mass  
"100 Questions and Answers About Hip Replacement"
8. Medical/Orthopaedic publications editorial/governing board (The following conflicts were disclosed)  
AAOS OrthoInfo Editor-In-Chief  
AAOS Now Editorial Board
9. Board member/committee appointments for a society (The following conflicts were disclosed)  
AAOS Board of Councilors  
AAOS Communications Cabinet  
Board of Directors New Jersey Orthopaedic Society  
Board of Directors Orthopedic Surgeons of New Jersey  
Past president NJOS, OSNJ and New Jersey Medical Liability Purchasing Alliance  
Patient and Public Relations Committee American Association of Hip and Knee Surgeons

**Each author must sign AND print or type his/her name, date and submit a separate form**

In addition, one BLINDED Conflict of Interest form (no author names used) should be submitted per manuscript with all author disclosures.

Stuart J Fischer MD

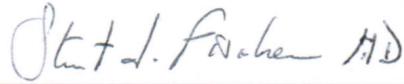

4.9.20

---

Author Name (Print or Type)

Author Signature

Date
